# Supplementary material for: Sensitive SERS detection of oral squamous cell carcinoma-related miRNAs in saliva via a gold nanohexagon array coupled with hybridization chain reaction amplification
Source: Royal Society of Chemistry journal article supplement (doi:10.1039/d2ay01180h), 2022-01-01
Supplement: d2ay01180h1.pdf [file d2ay01180h1.pdf]

# **Sensitive SERS detection of oral squamous cell carcinoma-related miRNAs in saliva via gold nanohexagons array coupled with hybridization chain reaction amplification**

Youwei Wang<sup>1#</sup>, Yatong Zhang<sup>2#</sup>, Qiu Du<sup>1</sup>, Demao Cao<sup>1</sup>, Xiaoxia Lu<sup>3\*</sup>, Zhibing Meng<sup>4\*</sup>

1. Department of neurosurgery, Affiliated Hospital of Yangzhou University, Yangzhou, Jiangsu, 225000, China.

2. Graduate School of Dalian Medical University, Dalian, Liaoning, 116011, China

3. Department of Oncology, Affiliated Hospital of Yangzhou University, Yangzhou, Jiangsu, 225000, China

4. Department of Oral and Maxillofacial Surgery, Affiliated Hospital of Yangzhou University, Yangzhou, Jiangsu, 225000, China.

\* Correspondence: E-mail: Mengzhibing2007@163.com

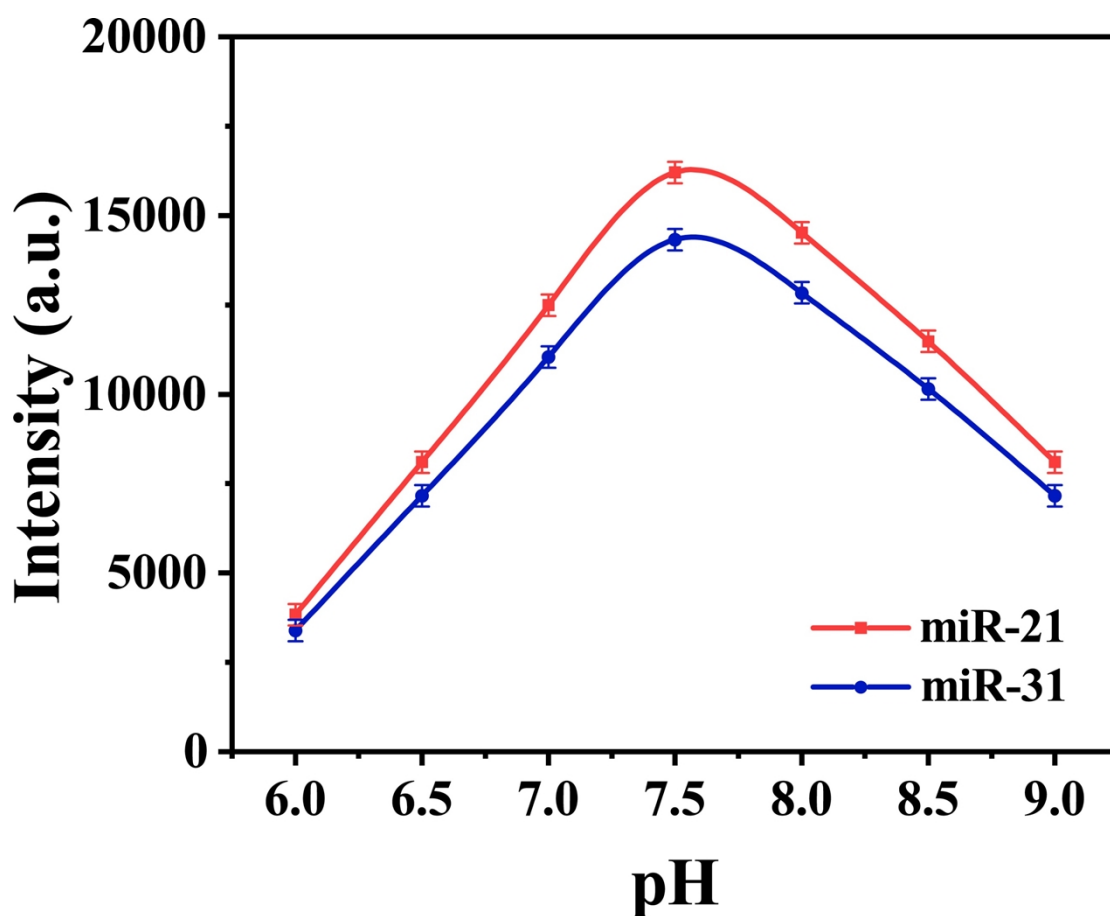

Fig. S1 Optimization parameters: pH.

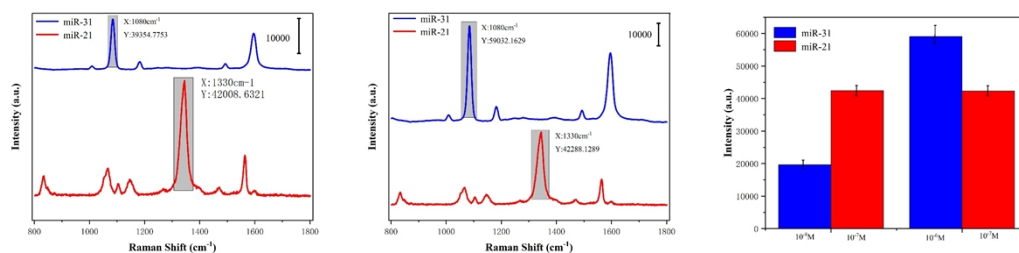

Fig. S2 The correlation between miR-31 and miR-21: (A) MiR-31 and miR-21 concentrations were  $10^{-8}$ M and  $10^{-7}$ M, respectively. (B) The concentrations of miR-31 and miR-21 were  $10^{-6}$ M and  $10^{-7}$ M, respectively. (C) Corresponding histograms of SERS intensity at  $1080\text{ cm}^{-1}$  and  $1330\text{ cm}^{-1}$  from different concentrations of miR-31 and miR-21.

| Patient ID | TNM Stages | Age(y) | Pathology | Patient ID | TNM Stages | Age(y) | Pathology |
|------------|------------|--------|-----------|------------|------------|--------|-----------|
| 1          | IVA        | 61     | Malignant | 31         | healthy    | 69     | Control   |
| 2          | III        | 63     | Malignant | 32         | healthy    | 57     | Control   |
| 3          | III        | 67     | Malignant | 33         | healthy    | 56     | Control   |
| 4          | III        | 69     | Malignant | 34         | healthy    | 63     | Control   |
| 5          | III        | 58     | Malignant | 35         | healthy    | 61     | Control   |
| 6          | III        | 64     | Malignant | 36         | healthy    | 58     | Control   |
| 7          | II         | 68     | Malignant | 37         | healthy    | 66     | Control   |
| 8          | II         | 65     | Malignant | 38         | healthy    | 62     | Control   |
| 9          | II         | 67     | Malignant | 39         | healthy    | 65     | Control   |
| 10         | II         | 63     | Malignant | 40         | healthy    | 68     | Control   |
| 11         | II         | 70     | Malignant | 41         | healthy    | 54     | Control   |
| 12         | II         | 71     | Malignant | 42         | healthy    | 70     | Control   |
| 13         | II         | 73     | Malignant | 43         | healthy    | 46     | Control   |
| 14         | II         | 60     | Malignant | 44         | healthy    | 66     | Control   |
| 15         | II         | 64     | Malignant | 45         | healthy    | 60     | Control   |
| 16         | II         | 65     | Malignant | 46         | healthy    | 58     | Control   |
| 17         | II         | 68     | Malignant | 47         | healthy    | 47     | Control   |
| 18         | II         | 74     | Malignant | 48         | healthy    | 52     | Control   |
| 19         | II         | 67     | Malignant | 49         | healthy    | 67     | Control   |
| 20         | II         | 64     | Malignant | 50         | healthy    | 71     | Control   |
| 21         | I          | 69     | Malignant | 51         | healthy    | 73     | Control   |
| 22         | I          | 74     | Malignant | 52         | healthy    | 58     | Control   |
| 23         | I          | 70     | Malignant | 53         | healthy    | 64     | Control   |
| 24         | I          | 65     | Malignant | 54         | healthy    | 59     | Control   |
| 25         | I          | 67     | Malignant | 55         | healthy    | 62     | Control   |
| 26         | I          | 71     | Malignant | 56         | healthy    | 66     | Control   |
| 27         | I          | 61     | Malignant | 57         | healthy    | 58     | Control   |
| 28         | I          | 65     | Malignant | 58         | healthy    | 52     | Control   |
| 29         | I          | 72     | Malignant | 59         | healthy    | 61     | Control   |
| 30         | I          | 66     | Malignant | 60         | healthy    | 64     | Control   |

**Table S1.** Information of clinical saliva samples

## References:

1. A. Idili, A. Porchetta, A. Amodio, A. Vallée-Bélisle and F. Ricci, Controlling hybridization chain reactions with pH, *Nano Lett.*, 2015, **15**(8):5539-44. DOI: 10.1021/acs.nanolett.5b02123.
